# Supplementary material
Source: MDPI journal article supplement (https://www.mdpi.com/2071-1050/10/12/4437)
Supplement: s1 [file s1]

## Sheet: Cover page
Supplementary information File S1
Characterizing livestock production in Portuguese sown rainfed grasslands: applying the inverse approach to a process-based model
Sustainability
This file contains:
Sheet: AGRO 87 and 71 Data	Soil organic matter (%), bulk density(g/cm3), clay content (%), aboveground productivity (t DM/há), stocking rate (LU/há), air temperature (ºC/month) and rainfall (mm/month) for AGRO 87 and 71
Sheet: EDP Data	Soil organic matter (%), bulk density(g/cm3), clay content (%), air temperature (ºC/month) and rainfall (mm/month) for AGRO 87 and 71

## Sheet: AGRO 87 and 71 Data
	Farm	Bulk density (g/cm3)	Clay content (%)	SOM (%)					Stocking rate (LU/ha)				Productivity (t DM/ha)
				2001	2002	2003	2004	2005	2001-2002	2002-2003	2003-2004	2004-2005	2001-2002	2002-2003	2003-2004	2004-2005
	1	1.41093	17.9305	1.55	2.17	3.05	3.6	3.8	0.7153	1.2139	1.3895	0.614	-	-	-	-
	2	1.38692	21.3937	1.75	2.15	2.65	2.7	5.4	0.8355	1.2124	1.2292	0.354	4.92	9.0566	8.42213	3.728
	3	1.35833	8.50563	0.45	0.73	1.2	1.63	1.6	-	0.72224	1.2598	0.3691	-	-	-	-
	4	1.35388	25.087	3.4	3.08	5.1	4.6	5.6	1.1229	1.4815	1.5277	0.4819	-	10.6806	2.36649	0
	5	1.44109	14.7726	0.65	0.81	1	1.28	1.5	0.3536	1.1794	0.6158	-	-	3.91393	2.11066	-
	6	1.49645	8.61779	1.82	2.09	2.4	2.18	2.7	0.6255	0.9773	1.2996	-	7.05	9.27052	5.82067	-
	7	1.42427	17.2399	0.55	0.83	1.14	1.6		-	-	-	-	-	-	-	-
	8	1.43286	15.4888	0.8	1.4	1.54	2.08		-	-	-	-	-	-	-	-
		Monthly mean air temperature (°C/month)								Monthly rainfall (mm/month)
		1	2	3	4	5	6	7	8	1	2	3	4	5	6	7	8
	2001-09-01	25.4978	27.6787	23.8386	24.9981	26.2419	24.616	24.8637	27.9604	43.1276	71.7016	37.8095	30.4289	55.1609	36.2575	68.9125	63.6394
	2001-10-01	16.1886	17.6438	17.6609	17.8075	16.9643	14.9643	18.187	19.1995	119.526	122.133	107.036	88.732	100.144	160.117	93.7382	97.7759
	2001-11-01	11.3416	11.5483	11.6884	11.9364	11.3052	9.79511	12.099	13.0999	21.0158	44.6898	12.2429	26.3819	34.0415	20.5898	70.1824	61.0782
	2001-12-01	7.52544	7.3817	7.4337	8.81002	8.31517	4.5014	10.0185	10.7825	15.2424	40.7745	25.2259	64.3433	37.6379	0.587295	162.042	79.4967
	2002-01-01	9.16553	9.34084	10.7955	10.5442	10.3251	7.03518	11.0902	11.4708	80.3232	65.3161	71.7005	52.2171	64.3321	118.805	61.7552	56.5671
	2002-02-01	11.607	11.7148	12.3883	12.499	12.0874	9.82791	12.7363	13.7803	22.9371	17.9151	15.9896	19.8982	17.6105	39.8091	29.3944	12.225
	2002-03-01	11.465	12.6099	13.6085	13.0951	11.9418	11.537	12.4021	13.5702	101.408	87.6589	91.2762	97.447	94.4941	129.878	88.7748	87.3765
	2002-04-01	17.8017	18.5572	18.0306	17.0824	17.2526	16.7842	18.0489	21.0161	50.34	52.3252	42.1487	63.3725	47.9567	46.4221	71.5226	75.319
	2002-05-01	19.1649	21.7258	20.5058	19.7767	20.0206	19.3531	21.1106	24.378	22.5403	22.8308	13.5872	11.3366	19.7681	30.08	17.7522	16.2486
	2002-06-01	26.0563	28.4665	24.9946	24.174	25.8706	25.98	26.3397	29.9657	3.72464	2.47073	4.22107	7.64164	2.32747	10.4545	4.56201	2.94176
	2002-07-01	29.673	31.2858	27.388	27.3858	29.213	29.4318	29.509	33.0335	0.430569	0.343263	1.205	0.63756	0	0.305842	0.532036	0.372796
	2002-08-01	28.2606	30.9303	26.7033	26.845	28.4122	27.9626	28.1297	31.1806	6.82695	6.3205	0.221074	0.850303	4.5205	5.4785	0.616462	0.320316
	2002-09-01	22.1314	23.8416	21.9803	22.961	23.2558	20.7352	22.9826	26.6202	86.7619	60.1347	95.4618	87.9222	80.9274	151.27	110.212	99.1904
	2002-10-01	15.0368	17.2198	17.1165	17.7152	16.063	14.332	16.8199	18.2626	63.2045	61.9675	90.6413	64.3599	77.187	115.718	80.121	77.2786
	2002-11-01	10.576	12.3838	13.1973	12.6984	11.7795	10.6128	12.5971	13.8909	107.346	86.6367	144.914	114.854	108.307	174.862	112.161	79.2247
	2002-12-01	8.52964	10.9617	11.1815	11.3305	10.2175	7.52612	11.1564	11.0737	140.951	103.372	125.237	110.267	110.354	246.875	119.405	109.073
	2003-01-01	7.1155	8.54451	9.04127	9.15938	8.23625	6.11791	8.65696	9.55288	90.0651	65.8627	101.559	73.3037	84.5582	204.619	65.5928	48.6305
	2003-02-01	9.54142	9.8802	11.033	9.99123	9.98019	7.15129	9.61648	10.6156	83.8828	67.8234	88.7701	94.3901	79.1873	106.488	91.2193	77.13
	2003-03-01	13.6269	13.7861	15.12	13.8704	14.0267	12.119	13.7729	15.6496	68.2622	42.6317	70.7879	31.4899	43.1969	108.531	46.2621	33.421
	2003-04-01	14.5565	16.3065	16.7154	15.9092	15.7292	14.7986	16.1516	18.4439	64.4631	64.1783	108.794	103.126	76.4472	124.954	94.295	82.6507
	2003-05-01	22.1086	23.4925	21.916	20.6214	21.4176	20.9519	21.8064	25.4141	3.45926	6.42697	2.99356	10.6609	5.32784	0.809474	12.9544	7.85898
	2003-06-01	27.15	29.5983	25.1832	25.2114	27.1996	26.6678	26.7052	30.9251	2.99331	1.36201	5.92978	3.09998	0.841394	11.84	3.87356	1.52197
	2003-07-01	28.6118	31.9793	26.4555	26.5025	28.1835	27.9485	28.6614	32.4992	1.61563	0.398479	4.41223	3.57212	0.380774	8.59679	1.67138	0.862468
	2003-08-01	32.7008	32.3178	28.0021	28.1643	30.1153	29.3047	29.5994	32.8204	8.57269	0.574078	15.5038	2.33419	3.86632	32.5834	1.74674	1.19252
	2003-09-01	27.929	27.6808	24.8454	25.7661	26.3029	24.4464	26.3324	29.2561	10.5015	11.117	18.5749	16.658	12.9438	22.4784	7.69784	8.1861
	2003-10-01	16.8069	17.1845	16.964	17.6446	17.1854	15.2756	16.2823	19.1176	159.871	162.119	172.642	149.793	144.138	311.876	155.868	167.458
	2003-11-01	11.9743	12.5853	12.8864	13.0507	12.5916	10.2097	13.3967	14.6031	128.09	91.0139	108.021	91.665	74.7467	195.645	111.204	106.556
	2003-12-01	8.60321	9.75128	9.60241	9.49162	8.62441	6.41716	9.98256	10.532	74.3675	64.4391	75.6933	81.848	64.5176	167.287	93.7523	67.809
	2004-01-01	9.76381	9.60606	10.189	10.2466	9.58876	7.59323	10.3142	10.5573	43.5512	32.1794	63.9776	34.809	38.7716	55.8185	34.1738	29.343
	2004-02-01	10.4167	10.5904	11.4023	10.8804	11.0186	8.47731	11.4568	12.073	63.0707	45.7787	51.7543	63.0548	54.7743	57.7566	79.7249	63.9249
	2004-03-01	13.3088	13.492	13.6257	13.2655	12.9021	11.5589	12.9549	14.7318	27.9528	31.9012	40.3434	47.3772	29.1929	39.9463	48.5149	41.7562
	2004-04-01	16.8106	17.2771	17.5924	15.9388	15.9063	15.5944	17.005	19.3249	27.8769	24.4169	31.6041	25.9894	23.2007	54.1267	24.6543	30.7733
	2004-05-01	20.9165	22.448	21.0791	19.4173	21.5843	18.867	20.915	23.898	42.0575	34.6137	18.1645	24.8814	32.4808	48.5141	41.8043	43.5757
	2004-06-01	30.8787	31.8029	27.2231	26.7096	28.4921	28.9131	28.7819	32.2505	0.701446	1.90763	1.03411	1.16396	0	5.32138	2.02514	1.90759
	2004-07-01	31.5459	32.8389	27.4573	27.6092	29.6694	29.2222	29.4158	33.2906	3.24484e-05	0.195582	0.379004	0.542945	0	0.502751	0.334813	0.209245
	2004-08-01	28.6088	30.884	25.6639	27.1579	28.0929	26.3645	28.1181	31.1214	21.2878	9.12284	15.3721	15.4084	9.89896	45.8176	10.1594	11.7059
	2004-09-01	27.1978	28.2055	23.6492	25.4444	26.5336	24.3242	26.4573	28.9936	1.83439	10.7861	19.0076	5.86387	11.4636	13.4096	7.86777	6.83117
	2004-10-01	19.2469	22.0565	18.2517	19.9049	20.6232	16.2925	20.0292	22.6678	167	124.255	108.792	91.3209	109.369	207.079	86.4025	73.9165
	2004-11-01	12.4051	12.7423	12.4189	13.3531	12.6845	9.80981	13.4983	14.4634	20.4184	21.7749	24.5856	25.3075	22.8701	24.9539	31.6665	15.4194
	2004-12-01	8.56594	9.1004	9.92711	9.40409	8.55995	7.15709	9.41605	10.1165	15.1841	25.726	23.1106	33.3565	28.6462	42.0032	58.7234	31.5433
	2005-01-01	8.31169	7.76527	8.23024	8.64384	8.32143	5.33664	8.81108	9.50113	0.000192958	1.50387	0.0235141	5.2702	0.201139	1.43468	10.8351	5.87696
	2005-02-01	9.54345	9.6416	9.6042	9.48391	9.32591	7.0697	10.0492	11.4866	2.79557	9.77223	6.56267	25.0348	6.33515	34.7086	30.5441	22.3968
	2005-03-01	12.1846	13.5985	13.0263	13.4732	13.3144	10.6218	13.1719	15.4521	37.8344	26.2542	42.3582	28.3624	32.8493	59.2685	33.588	24.6122
	2005-04-01	18.2416	21.1589	18.3237	19.7121	18.66	15.9704	19.5263	23.1455	19.2296	15.5059	21.4872	9.89702	15.8984	50.2307	11.9631	9.90921
	2005-05-01	21.7974	25.3296	22.5532	23.5763	24.6368	21.7572	23.9198	27.4514	17.9192	37.4338	22.0456	29.7795	28.0059	29.2514	26.5724	27.024
	2005-06-01	29.9245	31.5894	26.8081	27.8311	28.7182	28.6103	28.4392	32.2916	8.90574e-05	2.92381	1.74971	2.5212	1.40023	1.62207	6.4196	13.6523
	2005-07-01	32.1	34.8235	28.1802	29.1956	31.2466	29.872	30.8669	34.4032	1.36752	0.402528	5.25398	1.90853	0.0185495	6.31979	5.82656	2.64766
	2005-08-01	32.1405	33.3649	28.6486	29.2495	31.3051	29.5674	30.271	33.6701	1.39561	3.03764	2.32403	2.03861	1.5971	2.63204	1.08866	1.02259

## Sheet: EDP Data
	Farm	Bulk density (g/cm3)	Clay content (%)	SOM (%)
				2006	2007	2008	2009	2010	2011	2012
	6	8.89437	1.49644	3.4	3.24112	5.9047	-	-	-	-
	6	8.89437	1.49644	1.8	1.8464	2.13431	2.15672	1.82399	1.9826	-
	6	8.89437	1.49644	1.3	1.93605	2.13431	2.09983	1.55143	1.85847	-
	6	8.89437	1.49644	2.25	2.72047	3.02217	2.39808	2.49808	2.32912	-
	6	8.89437	1.49644	2.3	3.81694	5.0496	3.68074	7.3632	5.52197	-
	6	8.89437	1.49644	2.9	3.66522	4.75824	3.929	4.13243	3.00493	-
	6	8.89437	1.49644	3.5	4.20656	3.41352	2.66013	2.48256	2.88253	-
	6	8.89437	1.49644	2.9	2.0188	2.43946	2.63772	2.82564	2.80667	-
	6	8.89437	1.49644	2.6	2.41188	2.4636	2.54462	2.30326	2.43084	-
	6	8.89437	1.49644	3.4	3.05838	2.81529	2.31878	3.26698	2.54721	-
	6	8.89437	1.49644	1.5	1.82227	1.95329	1.94122	1.82916	1.8602	-
	6	8.89437	1.49644	1.5	1.82227	2.46877	2.35326	2.62048	2.69806	-
	6	8.89437	1.49644	2.3	1.35265	1.99122	1.84296	1.8964	2.09811	-
	6	8.89437	1.49644	-	3.4	2.68944	2.59807	2.2912	2.58428	-
	6	8.89437	1.49644	-	2.06667	2.69461	3.3256	3.1463	4.1807	-
	6	8.89437	1.49644	-	-	3.51351	2.91011	3.2256	3.10492	-
	6	8.89437	1.49644	-	-	2.8377	2.14638	2.15672	2.36188	-
	6	8.89437	1.49644	1.9	2.39808	1.12594	1.08112	1.41247	1.11319	-
	9	5.25286	1.1846	-	4.17725	1.71055	1.65849	1.76538	1.72107	1.58298
	9	5.25286	1.1846	-	1.30386	2.0257	2.09294	1.82916	1.78262	1.68262
	9	5.25286	1.1846	-	1.32334	1.16318	0.765973	0.744251	0.635466	0.764766
	9	5.25286	1.1846	-	0.652534	1.46868	2.17741	1.96019	2.01191	1.96881
	9	5.25286	1.1846	-	1.29041	1.31421	1.84813	2.03949	2.01363	1.35524
	9	5.25286	1.1846	-	1.07888	0.900273	1.33282	0.96613	0.945097	0.858552
	9	5.25286	1.1846	-	1.36386	1.00251	1.29903	1.1075	1.9033	1.43626
	9	5.25286	1.1846	-	1.5254	0.804763	1.52238	1.45945	1.41747	1.41799
	9	5.25286	1.1846	-	1.31938	1.57453	1.74115	1.47936	1.79641	1.5897
	9	5.25286	1.1846	-	1.20197	0.923719	1.28748	1.6259	-	-
	9	5.25286	1.1846	-	1.36041	1.17301	1.24145	1.46764	1.06647	1.14594
	9	5.25286	1.1846	-	-	-	-	2.18603	2.14466	2.4136
	9	5.25286	1.1846	-	-	-	-	2.37912	2.35498	2.74806
	9	5.25286	1.1846	-	-	-	-	1.89468	1.99984	2.33947
	9	5.25286	1.1846	-	-	-	-	1.88778	1.72572	0.934236
	9	5.25286	1.1846	-	-	-	-	1.74641	1.18663	1.52643
	9	5.25286	1.1846	-	-	-	-	1.12767	0.860621	1.54039
	9	5.25286	1.1846	-	-	-	-	2.16707	2.12224	2.41532
	9	5.25286	1.1846	-	-	-	-	1.09491	0.984232	0.85838
	9	5.25286	1.1846	-	-	-	-	2.59807	2.96356	2.18258
	10	11.2784	1.12492	-	3.27732	3.30146	4.03416	2.83253	2.83081	-
	10	11.2784	1.12492	-	2.52394	4.12726	2.9808	2.27913	3.01528	-
	10	11.2784	1.12492	-	2.90149	3.43076	3.879	2.96183	1.88692	-
	10	11.2784	1.12492	-	2.40843	2.67048	2.81184	2.4136	1.77572	-
	10	11.2784	1.12492	-	1.52126	1.80158	1.42109	1.48609	1.9326	-
	10	11.2784	1.12492	-	1.73952	1.42713	2.17224	1.77141	2.02915	-
	10	11.2784	1.12492	-	2.60324	3.36008	2.30585	2.53169	4.19277	-
	10	11.2784	1.12492	-	4.24276	5.00994	2.9808	2.63858	2.42394	-
	10	11.2784	1.12492	-	2.4205	2.66013	2.68082	2.76874	2.30671	-
	10	11.2784	1.12492	-	2.25499	3.79452	2.79978	1.87054	2.14293	-
	10	11.2784	1.12492	-	2.90666	3.52558	3.3118	2.58945	2.54462	-
	10	11.2784	1.12492	-	3.62385	3.45145	3.32732	2.77909	3.85486	-
	11	11.7826	1.1218	-	1.79641	2.87908	2.28258	2.34292	2.30499	-
	11	11.7826	1.1218	-	2.43429	3.23595	3.22388	3.08768	2.83943	-
	11	11.7826	1.1218	-	2.5791	4.31517	3.16354	3.45317	2.57393	-
	11	11.7826	1.1218	-	2.65496	3.33422	2.57048	2.8084	2.81012	-
	11	11.7826	1.1218	-	2.07914	2.82219	2.30326	2.35498	2.4136	-
	11	11.7826	1.1218	-	1.9033	2.67737	2.78598	3.4549	2.72564	-
	11	11.7826	1.1218	-	2.49118	3.44972	4.55998	4.8341	4.24104	-
	11	11.7826	1.1218	-	1.43195	2.63082	2.0257	2.85839	1.70573	-
	11	11.7826	1.1218	-	1.0513	2.40498	2.72909	2.58772	1.78606	-
	11	11.7826	1.1218	-	1.9826	3.73936	3.67902	3.41697	1.5897	-
	11	11.7826	1.1218	-	1.23214	1.58539	2.13776	1.82916	2.47739	-
	11	11.7826	1.1218	-	1.71417	3.01872	2.79633	2.71702	2.6291	-
	11	11.7826	1.1218	-	1.55832	4.06864	3.66867	4.36	3.06872	-
	12	17.7903	1.3518	-	-	2.90666	2.8515	2.73755	3.017	-
	12	17.7903	1.3518	-	-	3.26181	2.48601	3.02907	3.55144	-
	12	17.7903	1.3518	-	-	2.2412	2.10673	2.4205	2.32568	-
	12	17.7903	1.3518	-	-	4.30655	4.93581	3.77556	4.37206	-
	12	17.7903	1.3518	-	-	2.34981	2.63427	2.52394	2.48773	-
	12	17.7903	1.3518	-	-	4.19277	3.72039	3.42386	4.4393	-
	12	17.7903	1.3518	-	-	2.69116	2.76874	2.76357	2.85839	-
	12	17.7903	1.3518	-	-	5.06856	5.26854	5.64782	4.46516	-
	13	13.1444	1.46157	-	-	2.99804	3.45748	3.09803	3.4118	-
	13	13.1444	1.46157	-	-	2.59117	3.28594	4.22725	2.90494	-
	13	13.1444	1.46157	-	-	3.53765	3.93072	3.81694	4.19104	-
	13	13.1444	1.46157	-	-	4.88926	5.99435	4.95995	5.17717	-
	13	13.1444	1.46157	-	-	2.9308	3.27905	2.48601	2.82046	-
	13	13.1444	1.46157	-	-	3.95658	4.79272	4.44964	5.9547	-
		Monthly mean air temperature (°C)						Monthly rainfall (mm)
		6	9	10	11	12	13	6	9	10	11	12	13
	2006-09-01	23.984	23.75	24.9648	24.9743	26.2397	26.0292	73.85	73.85	44.21	44.21	35.64	44.84
	2006-10-01	15.8855	19.5057	19.7833	19.9623	21.3907	19.085	51.65	51.65	25.9	25.9	36.6	45.79
	2006-11-01	9.80767	13.2583	13.6613	13.8118	15.2422	13.742	29.39	29.39	59.1	59.1	45.51	51.93
	2006-12-01	6.36767	9.3675	9.38533	9.473	10.811	9.65767	19.82	19.82	17.83	17.83	27.52	26.02
	2007-01-01	7.59467	10.8873	10.8323	10.7202	11.8705	10.9743	116.36	116.36	56.76	56.76	67.2	62.79
	2007-02-01	9.40967	13.1113	13.2248	13.1835	13.3727	12.6757	77.15	77.15	59.4	59.4	76.39	66.39
	2007-03-01	11.591	13.7723	13.6577	13.7627	14.6888	12.6617	24.42	24.42	24.63	24.63	35.76	21.49
	2007-04-01	15.6	17.8072	17.5355	17.4263	17.8567	16.5583	202.16	202.16	103.46	103.46	113.82	112.03
	2007-05-01	16.4195	17.5405	17.735	17.4433	19.3843	18.2093	85.01	85.01	66.83	66.83	56.28	52.57
	2007-06-01	24.7237	25.9177	26.6228	26.874	29.2158	25.9657	11.96	11.96	3.56	3.56	0.15	1.52
	2007-07-01	27.4985	26.5922	27.9415	28.0507	29.2492	28.2587	0.46	0.46	0.52	0.52	0	0
	2007-08-01	27.634	26.2278	27.459	27.3383	29.4443	27.824	7.73	7.73	1.79	1.79	1.48	1.4
	2007-09-01	21.8727	22.8633	23.544	23.836	25.1948	23.6523	31.94	31.94	15.7	15.7	16.52	14.29
	2007-10-01	15.3625	18.134	18.27	18.7052	20.0983	17.8327	33.73	33.73	22.28	22.28	36.69	30.5
	2007-11-01	8.97033	11.7493	11.9915	12.1977	13.5507	11.6773	22.21	22.21	21.32	21.32	30.98	25.85
	2007-12-01	4.95967	9.24483	8.463	8.55867	9.858	8.53067	80.42	80.42	56.34	56.34	53.07	52.86
	2008-01-01	4.18633	7.81017	7.941	7.68417	8.3055	7.3895	175.27	175.27	95.08	95.08	107.72	82.65
	2008-02-01	8.43433	11.4265	11.5638	11.6045	12.2513	10.897	82.39	82.39	47.85	47.85	57.24	64.35
	2008-03-01	15.5227	16.5393	17.257	17.511	18.0578	16.815	23.03	23.03	10.79	10.79	12.58	12.28
	2008-04-01	16.128	16.3675	16.2532	16.775	18.2963	16.2207	41.18	41.18	37.19	37.19	27.42	32.15
	2008-05-01	22.2975	23.7648	22.6597	22.7833	24.8635	23.2	30.63	30.63	29.59	29.59	18.11	17.66
	2008-06-01	27.2957	27.0338	27.0582	27.4265	29.6828	28.4333	41.2	41.2	40.64	40.64	19.82	28.79
	2008-07-01	28.2925	27.161	27.2572	27.7393	31.0472	29.0908	12.88	12.88	2.9	2.9	0	0
	2008-08-01	29.846	28.0283	29.272	29.56	31.6097	30.0367	9.87	9.87	2.05	2.05	0	1.48
	2008-09-01	24.7927	25.0647	25.4125	25.7878	27.646	26.2167	17.27	17.27	3.02	3.02	8.62	1.42
	2008-10-01	17.288	20.6013	20.256	20.9428	22.8773	21.7763	111.55	111.55	61	61	41.97	49.26
	2008-11-01	10.7813	13.501	12.9748	13.2338	15.6135	13.3135	124.04	124.04	72.08	72.08	46.78	58.76
	2008-12-01	5.03233	9.965	8.402	8.37483	11.1163	8.76267	232.79	232.79	155.84	155.84	171.51	141.16
	2009-01-01	5.29833	9.13567	8.591	9.1625	9.9675	8.21117	170.25	170.25	106.97	106.97	113.27	106.06
	2009-02-01	5.94933	11.0557	9.32017	9.58833	11.6455	9.77967	240.47	240.47	105.87	105.87	152.62	125.72
	2009-03-01	9.02467	12.4417	11.3605	11.0937	11.96	11.7612	167.16	167.16	96.3	96.3	88.03	100.77
	2009-04-01	15.407	17.1828	18.2085	17.5483	17.3777	16.159	106.46	106.46	58.75	58.75	60.15	54.03
	2009-05-01	18.113	21.0478	21.6813	21.1813	21.2173	19.886	43.44	43.44	21.25	21.25	33.32	26.14
	2009-06-01	24.5887	24.4242	25.7535	25.6122	26.8473	25.2677	20.7	20.7	16.17	16.17	17.33	12.72
	2009-07-01	30.2755	28.2382	30.0227	30.0233	31.8162	30.2737	0.68	0.68	0	0	0	0
	2009-08-01	29.162	28.3733	30.417	30.5317	31.8847	30.6633	0.28	0.28	0	0	0.2	0
	2009-09-01	23.7177	24.4942	25.4063	25.4778	26.6638	25.9442	13.7	13.7	0.38	0.38	1.75	0
	2009-10-01	15.405	17.7137	18.0687	17.8603	18.7193	17.811	171.1	171.1	61.76	61.76	96.1	69.48
	2009-11-01	9.59467	13.3123	11.9805	12.1387	13.6962	12.4528	138.82	138.82	62.48	62.48	71.32	60.24
	2009-12-01	5.639	9.142	8.04267	8.588	10.4013	8.34467	223.78	223.78	130.46	130.46	147.97	140.17
	2010-01-01	5.193	10.2913	9.42517	9.5075	11.5263	9.92917	94.86	94.86	84.82	84.82	73.04	75.89
	2010-02-01	8.744	11.6338	10.9872	11.3317	12.193	10.9457	96.89	96.89	101.76	101.76	81.09	102.45
	2010-03-01	12.3357	14.8247	14.2745	13.9677	15.0227	13.2402	90.73	90.73	53.98	53.98	70.71	67.34
	2010-04-01	18.3355	21.2672	21.089	20.9065	21.2235	20.2637	115.35	115.35	105.35	105.35	128.05	117.3
	2010-05-01	20.6185	21.482	22.4287	22.5683	22.9345	21.74	27.57	27.57	86.09	86.09	82.15	102.47
	2010-06-01	24.9767	24.7727	25.5163	25.4995	26.6217	24.7553	0	0	0	0	28.09	2.76
	2010-07-01	27.839	25.5975	27.179	27.2052	28.9295	27.0687	1.18	1.18	0	0	0	0
	2010-08-01	26.825	25.76	26.668	26.737	28.4233	26.8367	20.8	20.8	16.07	16.07	14.08	14.5
	2010-09-01	23.155	23.68	25.1008	25.0205	26.751	25.4288	3.45	3.45	20.05	20.05	28.77	22.82
	2010-10-01	19.3365	20.94	21.5797	22.408	22.8553	22.3687	105.25	105.25	65.98	65.98	61.67	69.21
	2010-11-01	8.86367	12.704	12.3492	12.9383	13.5837	12.2423	156.58	156.58	170.02	170.02	136.01	158.71
	2010-12-01	6.48933	9.76233	9.52333	9.94467	10.7453	9.57517	21.63	21.63	25.96	25.96	37.68	39.22
	2011-01-01	6.323	9.36683	9.7675	9.8485	9.63067	9.35883	0	0	4.1	4.1	33.61	14.03
	2011-02-01	8.062	9.804	9.9765	10.3233	10.5068	9.18833	0	0	0.07	0.07	20.43	17.71
	2011-03-01	13.5127	15.393	15.1863	15.622	16.499	15.763	0	0	8.97	8.97	43.28	22.53
	2011-04-01	13.079	13.5862	14.7363	16.1672	16.0905	14.0233	156.48	156.48	58.62	58.62	47.91	54.68
	2011-05-01	20.746	21.6388	22.0337	22.306	22.2513	20.6423	85.53	85.53	72.95	72.95	44.73	61.68
	2011-06-01	24.817	24.721	25.1062	24.999	27.011	25.162	2.31	2.31	2.22	2.22	0	0
	2011-07-01	28.1925	26.851	28.5838	29.0057	30.3572	29.067	0	0	0	0	0	0
	2011-08-01	27.1185	26.393	27.2497	27.3577	29.051	28.2457	12.26	12.26	5.87	5.87	1.09	1.6
	2011-09-01	24.2473	25.0338	26.2748	27.1642	28.3933	26.3343	69.68	69.68	38.7	38.7	26.54	31.8
	2011-10-01	16.2625	18.8013	18.9013	19.0115	20.4167	18.4847	133.26	133.26	109.11	109.11	80.75	118.6
	2011-11-01	9.05267	12.075	11.4055	11.4973	12.2317	11.5182	228.55	228.55	160.62	160.62	178.9	188.2
	2011-12-01	6.031	9.92833	9.318	9.754	10.908	9.67	115	115	100.79	100.79	97.17	113.06
	2012-01-01	6.65933	9.67833	9.41933	9.42583	10.6192	9.79767	242.03	242.03	111.62	111.62	87.34	84.64
	2012-02-01	7.67133	10.867	10.8657	10.866	10.8798	9.52167	76.55	76.55	56.13	56.13	59.46	57.63
	2012-03-01	9.30433	12.599	11.5805	11.4843	12.792	10.3797	396.46	396.46	227.78	227.78	165.3	177.8
	2012-04-01	15.7645	17.6538	17.399	17.7808	18.0487	16.3157	40.06	40.06	38.83	38.83	34.14	43.75
	2012-05-01	19.1095	21.1528	20.7477	20.6713	22.1745	19.8833	29.48	29.48	23.56	23.56	15.19	20.85
	2012-06-01	25.8837	26.1743	26.9483	27.2033	28.9982	26.5793	6.56	6.56	12.66	12.66	4.9	1.25
	2012-07-01	29.5745	28.0858	29.5825	30.0908	30.9707	30.3637	0	0	0	0	0	0
	2012-08-01	28.9035	27.7527	29.4237	29.8713	31.1667	29.78	0	0	0	0	0.27	0
